# Supplementary material for: Dystrophin R16/17-syntrophin PDZ fusion protein restores sarcolemmal nNOSμ
Source: PubMed Central journal article supplement (PMC6251231; doi:10.1186/s13395-018-0182-x), 2018-11-22
Supplement: 13395_2018_182_MOESM1_ESM.pdf [file 13395_2018_182_MOESM1_ESM.pdf]

Human Dys R16

MEISYVPSTYLTEITHVSQALLEVEQLLNAPDLCAKDFEDLFKQEESLKNIKDSLQQSSGRIDIHSHKTAALQSATPVER

Human Dys R17

VKLQEALSQLDFQWEKVNKMYKDRQGRFDRSVEKWRRFHDIKIFNQWLTEAEQFLRKTQIPENWEHAKYKWLKELQDGI

Linker

GQRQTVVRTLNATGEEIIQSSKTDASILQEKLGSNLRWQEVCKQLSDRKKRLEE GGSGLLLQRRRVTVRKADAGGLGIS

Mouse  $\alpha$ 1-syntrophin PDZ

IKGGRENKMPILISKIFKGLAADQTEALFVGDAILSVNGEDLSSATHDEAVQALKKTGKEVVLEV KYMKEVSPYF ILEVSK

GFP

GEELFTGVVPILVELDGDVNGHKFSVSGEGEGDATYGKLT LKFICTTGKLPVPWPTLVTTLT YGVQCFSRYPDHMKQHDF

KSAMPEGYVQERTIFFKDDGNYKTRAEVKFE GDTLVNRIELKGIDFKEDGNILGHKLEYNYN SHNVYIMADKQKNGIKVNF

Pal

KIRHNIEDGSVQLADHYQNTPIGDGPVLLPDNH YLSTQSALS KDPNEKRDHMLLEFVTAAGITLGMDELYK KDGK KKKK

KSKTKCVIM

**Supplementary Fig 1. The full amino acid sequence of dystrophin R16/17-syntrophin PDZ.GFP.Pal fusion protein.** The subdomains of the fusion protein was annotated by different colors (R16, R17, linker, syntrophin-PDZ, GFP, Pal).
